# Supplementary material for: Synchronous Biodegradability and Production of Dissolved Organic Matter in Two Streams of Varying Land Use
Source: Front Microbiol. 2020 Nov 16;11:568629. doi: 10.3389/fmicb.2020.568629 (PMC7701103; doi:10.3389/fmicb.2020.568629)
Supplement: Supplementary file 2 [file Table_1.XLSX]

## Sheet: Sheet1
																	Measurements taken at the start of the incubations (Initial)													Measurements taken at the end of the 5-day incubations (Final)													Difference between Initial (.a) and Final (.b) measurements
Site	Date	Month	DOY	Week	Season	Temp	Discharge	TSS	POC	PON	PP	Chla	DIC	TDN	TP	BDOC	DOC.a	SR.a	BA.a	FI.a	HIX.a	SUVA254.a	C1.a	C2.a	C3.a	C4.a	C5.a	C6.a	C7.a	DOC.b	SR.b	BA.b	FI.b	HIX.b	SUVA254.b	C1.b	C2.b	C3.b	C4.b	C5.b	C6.b	C7.b	DOC.c	SR.c	BA.c	FI.c	HIX.c	SUVA254.c	C1.c
Agriculture	2018-04-19	4	109	3	Spring	1.6	1.4959	38.8324	1.98437	0.148379	42.8994	18.6771	47.56	4.89569	18.0441	55.5944	6.298	0.811303	0.724456	1.55299	0.907407	1.62597	25.0524	22.9801	14.9409	6.07151	9.25297	15.1509	6.55121	3.50133	0.732891	0.745175	1.51309	0.93944	2.8284	25.5545	22.1522	17.8175	4.49783	8.87817	16.9913	4.10847	-2.79667	-0.0784119	0.0207198	-0.0398932	0.0320322	1.20243	0.50208
Agriculture	2018-04-30	4	120	4	Spring	9.7	0.8846	8.68	1.01517	0.117218	25.3189	33.5504	50.33	3.68636	8.05147	87.7266	4.72567	0.798682	0.78923	1.48119	0.933036	1.8734	23.6354	21.5043	19.5483	3.55001	7.89358	18.9708	4.89764	4.14567	0.77748	0.783331	1.46545	0.919954	1.97585	24.1125	22.8269	15.3958	5.43872	8.87115	17.8902	5.46469	-0.58	-0.0212016	-0.00589959	-0.0157354	-0.0130821	0.102452	0.477088
Agriculture	2018-05-08	5	128	5	Spring	14.7	0.4713	6.59333	0.574751	0.0649817	12.4956	19.2781	60.33	2.6456	6.48529	73.9519	6.71833	0.849509	0.751253	1.49498	0.909267	1.51087	23.06	21.939	17.2648	5.47235	7.74303	17.9031	6.61771	4.96833	0.858573	0.783305	1.40074	0.911906	1.79971	23.0574	22.2061	16.8906	4.86538	7.90028	18.5199	6.56034	-1.75	0.00906387	0.0320522	-0.094248	0.00263925	0.288849	-0.00263002
Agriculture	2018-05-14	5	134	6	Spring	15.5	0.3228	8.176	0.440184	0.0812157	9.22297	25.6766	64.17	2.30829	6.26471	69.8894	5.21633	0.855528	0.743815	1.35983	0.886708	1.81511	23.0302	22.353	13.7053	7.34989	8.39825	17.0449	8.11852	3.64567	0.827222	0.789894	1.39314	0.890503	2.41776	23.2761	22.8349	13.9182	6.55232	8.347	17.3972	7.67419	-1.57067	-0.0283053	0.0460788	0.0333136	0.00379519	0.602656	0.245991
Agriculture	2018-05-22	5	142	7	Spring	14	0.3401	10.9	0.570238	0.0929713	13.0515	63.4872	63.42	2.09381	7.69853	100.528	3.97467	0.835612	0.778979	1.41179	0.904153	2.71639	24.016	22.498	14.5057	6.55072	8.65374	16.8782	6.89765	3.99567	0.846552	0.778939	1.38893	0.916906	2.52849	24.3462	23.4012	14.5694	5.95263	8.64022	16.9332	6.15707	0.021	0.0109405	-4.02e-05	-0.022863	0.0127528	-0.187896	0.330218
Agriculture	2018-05-28	5	148	8	Spring	19.2	0.747	41.052	1.51773	0.203948	29.7368	40.1077	63.7	4.11198	17.25	103.838	5.12467	0.811077	0.735938	1.48315	0.923675	2.91349	24.6367	22.5737	16.2983	5.6516	8.71623	16.5415	5.58203	5.32133	0.768535	0.753296	1.44456	0.927659	2.59788	24.6291	23.2443	15.5589	5.87936	8.69128	16.8636	5.13344	0.196667	-0.0425418	0.0173586	-0.0385881	0.00398402	-0.31561	-0.00752811
Agriculture	2018-06-05	6	156	9	Summer	13.7	0.32	19.772	1.2162	0.18736	25.3521	54.6825	66.25	3.14927	13.3676	94.819	5.06333	0.805032	0.741165	1.5013	0.928516	2.81896	24.077	22.4112	16.7134	5.07997	8.36398	18.1035	5.25094	4.801	0.780933	0.752581	1.51445	0.920079	2.74632	24.2662	23.3156	14.6252	6.10928	8.80835	17.5678	5.30752	-0.262333	-0.0240985	0.0114162	0.0131464	-0.00843792	-0.0726403	0.189198
Agriculture	2018-06-12	6	163	10	Summer	21.4	0.1355	13.4	1.13523	0.148907	24.4969	38.7895	64.17	2.12442	14.5368	122.446	5.32233	0.870662	0.794823	1.52685	0.907227	2.06894	21.9342	21.428	18.427	4.34633	7.17009	19.4907	7.20368	6.517	0.864456	0.810246	1.49691	0.91503	1.54363	22.3287	22.3087	17.6752	4.60277	7.41841	19.5368	6.12935	1.19467	-0.00620611	0.0154224	-0.0299423	0.00780291	-0.525304	0.394438
Agriculture	2018-06-19	6	170	11	Summer	23.5	0.0524	13.4347	1.07416	0.146339	21.0046	65.1689	61.82	1.5975	21	100.032	5.198	0.951805	0.766965	1.46356	0.897686	2.39551	22.7698	21.9118	16.4013	5.88948	7.64152	17.53	7.85607	5.19967	0.939829	0.774376	1.45986	0.904254	2.2402	22.9239	22.8293	15.9516	5.71445	7.63038	17.6991	7.25129	0.00166667	-0.0119753	0.00741076	-0.00370025	0.0065677	-0.155306	0.154064
Agriculture	2018-06-26	6	177	12	Summer	21	0.0494	15.205	1.27627	0.151369	29.7184	34.7375	59.16	1.43661	19.8309	98.945	5.59267	0.925912	0.784989	1.41578	0.89979	2.24303	22.7883	21.278	17.039	5.48392	6.9109	18.6281	7.87188	5.53367	0.903508	0.795714	1.362	0.903976	2.13604	23.181	21.8108	15.9221	5.50848	7.23715	19.3724	6.9681	-0.059	-0.0224039	0.0107257	-0.0537729	0.00418627	-0.106986	0.39268
Agriculture	2018-07-03	7	184	13	Summer	29.6	0.0449	13.9783	1.64762	0.199113	34.0245	79.0827	59.14	0.906862	23.3382	122.533	5.475	0.962006	0.768488	1.40987	0.897445	2.56803	22.7192	21.3734	17.5678	5.71538	6.44588	18.3902	7.78822	6.70867	0.930912	0.744923	1.41308	0.915877	2.02959	22.4595	22.0703	18.5221	5.14659	6.10211	19.3203	6.37918	1.23367	-0.0310939	-0.0235646	0.00320859	0.0184321	-0.538437	-0.259672
Agriculture	2018-07-10	7	191	14	Summer	25.9	0.0506	15.5827	1.17337	0.157823	38.512	84.1859	54.39	0.820676	23.2721	90.7006	6.06133	0.928938	0.788752	1.42707	0.893137	2.58802	23.0562	20.7977	16.3151	5.95175	6.74713	19.1497	7.98241	5.49767	0.948968	0.788438	1.44265	0.903035	2.72719	22.9802	20.6654	17.5589	4.94788	6.5065	19.8542	7.48698	-0.563667	0.0200299	-0.000314452	0.015585	0.0098988	0.139168	-0.0760367
Agriculture	2018-07-17	7	198	15	Summer	23.8	0.2682	32.562	2.95962	0.35179	79.6188	121.377	49.45	1.54169	62.3382	116.936	7.308	0.880718	0.75066	1.42164	0.905618	3.02992	24.2832	21.7831	16.7401	5.89558	7.10688	16.781	7.41013	8.54567	0.891352	0.764371	1.41571	0.910469	2.71703	24.5824	21.2664	17.5057	5.43896	7.10526	17.1636	6.93757	1.23767	0.0106344	0.0137115	-0.00592544	0.00485039	-0.312894	0.299277
Agriculture	2018-07-25	7	206	16	Summer	22.1	0.8555	62.3125	3.62301	0.396247	102.033	97.9661	47.15	2.23521	84.5294	116.293	8.67033	0.806985	0.711367	1.43575	0.924106	3.8011	26.537	20.1671	16.5802	6.3959	8.02592	16.4367	5.85722	10.083	0.786637	0.726009	1.44061	0.925439	3.13483	27.0136	21.0515	15.1071	6.97727	8.28632	16.4489	5.11537	1.41267	-0.0203474	0.0146413	0.00486388	0.00133286	-0.666273	0.476563
Agriculture	2018-07-31	7	212	17	Summer	22.8	0.1095	16.3157	1.30917	0.23217	34.832	51.0775	62.92	1.45097	33.0882	87.7068	7.13133	0.909519	0.80231	1.50773	0.920004	2.10441	23.0214	19.867	18.9806	4.03767	6.52229	21.3156	6.2554	6.25467	0.870967	0.809915	1.41003	0.922763	2.27268	23.2188	20.9318	17.9577	4.46468	6.55743	21.2322	5.63735	-0.876667	-0.0385518	0.00760473	-0.0977051	0.00275931	0.168273	0.19739
Agriculture	2018-08-07	8	219	18	Summer	27.1	0.0457	7.52879	1.2293	0.18945	28.4627	57.139	56.78	0.858466	17.2721	88.5097	5.86	0.947858	0.81246	1.4628	0.913074	2.39147	23.0815	19.8586	19.1986	4.39624	6.10815	20.7471	6.60989	5.18667	0.916745	0.789879	1.45147	0.926327	2.56514	23.3353	20.2387	19.2996	4.07733	6.18044	21.3505	5.51804	-0.673333	-0.0311132	-0.0225809	-0.0113238	0.0132528	0.173663	0.253874
Agriculture	2018-08-14	8	226	19	Summer	26	0.0268	7.30526	1.19859	0.237641	27.8611	39.5875	55.74	0.738201	22.4338	91.842	5.95733	0.948252	0.789687	1.38556	0.923372	2.31582	22.9887	19.5164	21.1634	3.55906	5.53572	20.9524	6.28435	5.47133	0.952422	0.80215	1.39157	0.914502	2.4162	23.3185	20.8055	17.4958	4.97503	6.49202	20.1947	6.71848	-0.486	0.00416953	0.0124623	0.00601339	-0.00887059	0.100384	0.329802
Agriculture	2018-08-21	8	233	20	Summer	20.2	0.0566	12.5685	1.43501	0.19975	37.8956	64.4504	53.79	0.851807	48.8824	92.136	6.96	0.889512	0.776411	1.4739	0.929196	2.31901	24.1776	20.6753	16.0899	5.16939	7.31009	20.1747	6.40295	6.41267	0.899951	0.78146	1.46803	0.938617	2.42042	24.2774	20.8415	15.6123	5.00423	7.51597	21.3629	5.38559	-0.547333	0.0104389	0.00504822	-0.0058709	0.00942165	0.101416	0.0997922
Agriculture	2018-08-28	8	240	21	Summer	23.5	0.1197	10.339	1.04094	0.107614	21.7842	22.6291	69.19	1.25963	37.6544	63.5952	8.53	0.896323	0.768035	1.43199	0.92737	1.8016	24.063	20.9103	16.2092	5.24341	7.68197	20.2101	5.68203	5.42467	0.869672	0.823404	1.48219	0.911752	2.57962	24.1485	21.9798	14.1928	5.86183	8.00118	19.7028	6.11303	-3.10533	-0.0266509	0.0553689	0.0502094	-0.0156186	0.778026	0.085493
Agriculture	2018-09-11	9	254	22	Autumn	16.7	0.0347	16.772	0.773704	0.115359	18.6876	23.7922	57	0.810789	24.9265	74.8233	6.13133	0.967324	0.801768	1.4923	0.912769	2.18735	23.7868	20.9175	17.7963	4.38754	6.67333	19.6334	6.80509	4.58767	0.942405	0.806983	1.47001	0.911309	2.75401	23.8327	21.4268	16.1114	4.92632	7.18613	19.8947	6.62192	-1.54367	-0.0249188	0.0052146	-0.0222835	-0.00145969	0.56666	0.045906
Agriculture	2018-09-25	9	268	23	Autumn	17.2	0.0173	3.917	0.73858	0.169429	17.4311	66.0371	57.27	0.649313	20.3824	72.4684	7.35033	0.985039	0.81013	1.58277	0.917196	1.66311	24.1936	19.8808	18.7073	2.75732	6.55075	21.136	6.7742	5.32667	0.95802	0.832422	1.43393	0.914575	2.16842	24.7441	20.9215	15.8271	4.13577	7.15697	20.7915	6.42307	-2.02367	-0.0270197	0.0222923	-0.148844	-0.00262	0.505307	0.550499
Agriculture	2018-10-09	10	282	24	Autumn	16.8	0.057	6.59157	0.664357	0.15045	15.1389	28.7173	59.58	1.14247	16.0588	60.3399	14.4167	0.932212	0.814333	1.44822	0.924306	0.99864	23.97	19.7262	16.4125	4.48298	7.12673	21.3758	6.90578	8.699	0.890083	0.816583	1.49595	0.959614	1.49729	24.2273	20.0889	17.5332	3.58087	6.80798	23.0607	4.70108	-5.71767	-0.0421293	0.00224936	0.0477289	0.0353086	0.498647	0.257268
Agriculture	2018-10-23	10	296	25	Autumn	7.1	0.0339	2.528	0.47917	0.106366	10.6151	13.9534	61.12	1.10978	15.1765	111.805	4.77767	0.934808	0.8187	1.46124	0.903818	2.35925	24.1333	21.2004	15.9877	3.79242	6.95842	19.9876	7.94019	5.34167	0.914754	0.811976	1.59971	0.916705	2.00197	24.259	20.5413	17.2387	2.79214	7.01035	21.3192	6.83938	0.564	-0.0200547	-0.00672458	0.138468	0.012887	-0.357283	0.125718
Agriculture	2018-11-06	11	310	26	Autumn	9	0.2834	7.668	0.675037	0.119532	15.2407	24.6222	69.65	3.65835	31.8529	105.034	5.66767	0.792959	0.83719	1.45224	0.902302	2.01398	25.9022	21.894	11.3196	6.94301	9.52674	17.9677	6.44676	5.953	0.765541	0.826127	1.52315	0.933312	1.753	26.0576	21.762	13.811	4.82245	9.06134	19.9368	4.54885	0.285333	-0.027418	-0.0110626	0.0709085	0.03101	-0.260985	0.155327
Forest	2018-04-19	4	109	3	Spring	7.4	0.4582	4.71057	0.30972	0.0371261	3.86676	4.06439	28.79	0.33039	11.7574	57.1089	6.44267	0.864635	0.64759	1.39509	0.910373	1.86594	30.0458	24.1821	13.0681	8.1194	8.0539	9.98641	6.54434	3.67933	0.82739	0.631006	1.37435	0.918217	3.22715	30.5535	24.2068	14.3717	7.94335	8.16189	9.12993	5.63283	-2.76333	-0.0372442	-0.0165838	-0.0207368	0.00784451	1.36121	0.507727
Forest	2018-04-30	4	120	4	Spring	8.1	0.479	10.2374	0.46963	0.06615	5.96094	14.9091	24.9	0.306563	12	93.6595	5.73033	0.859599	0.587866	1.35042	0.936044	2.76862	28.8878	23.5407	19.8843	6.528	6.13716	10.0579	4.96419	5.367	0.860314	0.589151	1.33351	0.931393	2.95232	29.1808	24.3281	17.8503	7.18317	6.52617	9.76193	5.1696	-0.363333	0.000715825	0.00128498	-0.0169155	-0.00465113	0.183707	0.293007
Forest	2018-05-08	5	128	5	Spring	12.6	0.3421	3.53333	0.31174	0.0445355	5.54605	14.9938	34.43	0.339115	12	74.7382	7.289	0.878312	0.608985	1.36503	0.932087	2.1301	27.1286	23.6186	21.0109	5.79934	5.77206	11.312	5.35843	5.44767	0.876744	0.629964	1.34495	0.933291	2.82308	27.8356	23.984	19.2383	6.32354	6.28092	11.2952	5.04239	-1.84133	-0.00156877	0.0209798	-0.0200788	0.00120487	0.69298	0.707024
Forest	2018-05-14	5	134	6	Spring	12.8	0.3005	2.81167	0.38491	0.047138	4.38634	14.0268	39.06	0.397847	11.8676	81.1242	5.11767	0.871709	0.679861	1.34375	0.914386	2.63053	26.7314	23.4939	18.1018	7.12885	6.4471	11.9277	6.16931	4.15167	0.864258	0.654374	1.30731	0.909279	3.3478	27.364	23.8997	15.2658	8.10065	7.2884	11.4612	6.62034	-0.966	-0.00745167	-0.0254869	-0.0364467	-0.00510682	0.717273	0.632592
Forest	2018-05-22	5	142	7	Spring	14	0.3124	5.42943	0.443129	0.057742	5.96101	21.0238	39.34	0.380104	12.0221	97.5755	4.482	0.871438	0.647048	1.39254	0.918443	3.31446	27.0959	23.6748	17.6327	7.27953	6.87299	11.4687	5.9754	4.37333	0.876617	0.649346	1.30735	0.924629	3.31376	27.9721	24.119	16.4624	7.40547	7.31629	11.2736	5.45109	-0.108667	0.00517895	0.0022977	-0.0851989	0.00618599	-0.000699944	0.876256
Forest	2018-05-28	5	148	8	Spring	18.1	0.3049	5.63433	0.46659	0.0480689	5.18068	19.0153	40.25	0.416216	19.5221	113.376	4.882	0.871648	0.62346	1.33638	0.933415	3.50486	26.8703	23.6235	20.3412	5.80815	6.16102	12.1532	5.04259	5.535	0.867538	0.634683	1.3368	0.93031	3.06945	27.269	23.8451	18.6129	6.49151	6.66204	11.9999	5.11952	0.653	-0.00410984	0.0112232	0.000423125	-0.00310572	-0.435409	0.39869
Forest	2018-06-05	6	156	9	Summer	12.8	0.3788	5.5884	0.631324	0.0989116	4.61516	13.1554	42.4	0.407315	15.2647	99.5599	5.15	0.867254	0.616976	1.33653	0.935495	3.49588	27.41	23.863	19.3345	5.86809	6.63194	12.0437	4.84874	5.12733	0.858456	0.629602	1.34342	0.924089	3.42494	27.7905	24.3411	16.5428	7.34935	7.33398	11.2804	5.36186	-0.0226667	-0.00879777	0.0126254	0.00689853	-0.011406	-0.0709355	0.380495
Forest	2018-06-12	6	163	10	Summer	14.8	0.2575	2.1252	0.470846	0.0367798	4.537	6.54768	43.41	0.540371	13.6103	120.112	4.16833	0.884891	0.651369	1.39515	0.935929	2.85614	25.6865	22.3626	22.4709	4.4286	5.67763	14.158	5.21578	5.00667	0.891022	0.649322	1.37422	0.933396	2.36333	26.2428	23.3483	19.6493	5.54265	6.28554	13.7662	5.16528	0.838333	0.00613123	-0.00204674	-0.020931	-0.00253273	-0.492817	0.556287
Forest	2018-06-19	6	170	11	Summer	16.4	0.1164	1.89345	0.360965	0.0459918	3.85631	7.30501	44.37	0.468566	12.3971	112.632	4.626	0.899624	0.635749	1.39501	0.936063	2.81295	26.39	23.2209	21.127	5.29259	5.92106	13.1098	4.93863	5.21033	0.896557	0.6484	1.35017	0.931295	2.51455	26.8537	23.7508	18.8258	6.04131	6.52235	12.6908	5.31519	0.584333	-0.00306717	0.0126518	-0.0448414	-0.00476823	-0.298396	0.463721
Forest	2018-06-26	6	177	12	Summer	12.9	0.1102	0.1752	0.31834	0.0459662	3.00836	2.16066	45.36	0.520821	20.5809	112.566	3.552	0.900073	0.701008	1.34644	0.901981	2.42022	26.4083	25.0707	9.71944	6.95074	9.95624	15.2846	6.61004	3.99833	0.879654	0.656251	1.38157	0.943511	2.17511	27.5236	22.044	20.8903	4.39869	5.76929	15.1901	4.18406	0.446333	-0.0198237	-0.027886	0.110654	0.051519	-0.194582	1.11526
Forest	2018-07-03	7	184	13	Summer	17.5	0.103	0.3568	0.279804	0.033476	3.15298	3.6007	44.9	0.467484	14.4044	157.434	3.643	0.912553	0.647165	1.34814	0.926214	3.03766	25.5655	22.568	21.0449	4.89603	5.24404	14.4476	6.23386	5.73533	0.91404	0.653621	1.4264	0.938276	1.94217	25.6987	19.7191	25.1552	3.87555	3.41645	17.1039	5.03111	2.09233	0.00148782	0.00645571	0.0782571	0.0120623	-1.09549	0.133244
Forest	2018-07-10	7	191	14	Summer	15.1	0.1078	0.496	0.194943	0.0431799	2.22086	2.96364	46.16	0.526394	16.4559	93.4006	3.369	0.926659	0.758343	1.33058	0.906578	2.70619	26.583	21.7078	15.8052	6.63226	7.36406	14.8579	7.04968	3.14667	0.931733	0.699446	1.38855	0.91669	2.85032	26.3115	21.9507	17.6978	6.40307	6.24262	15.1555	6.23881	-0.222333	0.00507416	-0.0588974	0.0579706	0.0101117	0.144132	-0.271532
Forest	2018-07-17	7	198	15	Summer	16.4	0.182	0.5888	0.287695	0.0485119	4.3021	8.39945	46.89	0.563352	15.2426		3.627	0.893642	0.691191	1.32755	0.930211	3.37586	25.8577	22.1374	19.5208	5.66499	5.70838	15.2297	5.88107	11.4533	0.895466	0.666135	1.36384	0.935019	1.06739	26.3258	22.4213	20.9291	4.52657	5.35819	15.0998	5.33918	7.82633	0.00182375	-0.0250559	0.0362836	0.00480831	-2.30848	0.468154
Forest	2018-07-25	7	206	16	Summer	19.8	0.3006	7.842	0.789222	0.0916271	11.1643	11.8499	44.05	0.345691	25.9853	62.3665	11.24	0.887006	0.681582	1.34046	0.939676	1.70108	27.0666	22.8515	20.5095	5.04211	5.70549	13.8983	4.92647	7.01	0.885678	0.66837	1.36769	0.930501	2.64134	27.4922	23.3823	17.8307	6.06544	6.32094	13.5007	5.40772	-4.23	-0.00132884	-0.0132112	0.0272256	-0.00917441	0.940258	0.425555
Forest	2018-07-31	7	212	17	Summer	17.3	0.2522	2.682	0.398282	0.0389995	5.53125	4.58833	45.45	0.413838	10.8309	104.344	5.532	0.870917	0.613229	1.39497	0.952706	3.06176	27.4753	22.9608	21.5946	3.91017	5.51655	14.4716	4.07105	5.77233	0.865909	0.676959	1.42266	0.936986	2.88237	27.797	23.2382	17.8829	5.55103	6.49498	14.3484	4.6875	0.240333	-0.00500789	0.0637302	0.0276953	-0.0157192	-0.179395	0.321681
Forest	2018-08-07	8	219	18	Summer	18.3	0.2157	0.964	0.243413	0.0598827	3.95992	5.25022	46.78	0.446705	8.84559	109.252	4.31267	0.895398	0.685995	1.3187	0.915419	3.06761	26.815	23.0842	17.2993	6.61084	6.45759	13.4132	6.31979	4.71167	0.875261	0.67121	1.40792	0.937025	2.74281	27.3736	22.6013	19.9958	4.95888	5.82496	14.3885	4.8569	0.399	-0.0201371	-0.0147853	0.0892264	0.021606	-0.324801	0.558577
Forest	2018-08-14	8	226	19	Summer	16.6	0.1804	0.688	0.216542	0.0424813	4.61449	3.42319	47.42	0.50696	9.04412	119.747	3.798	0.889207	0.640165	1.36776	0.93383	2.97867	26.4203	22.277	20.4623	5.02564	5.51577	14.9198	5.37927	4.548	0.895436	0.704365	1.32081	0.924288	2.45155	26.8998	23.2932	17.0632	6.38391	6.41663	14.0176	5.92564	0.75	0.0062284	0.0641997	-0.0469419	-0.00954236	-0.527119	0.479541
Forest	2018-08-21	8	233	20	Summer	16.4	0.2293	0.968	0.26485	0.0391971	2.56626	4.48793	48.56	0.418394	10.2132	81.5043	5.61933	0.895753	0.66256	1.36456	0.965913	2.16692	27.0053	23.0042	19.5952	5.23259	5.99803	14.6707	4.49397	4.58	0.887163	0.661175	1.40708	0.963531	2.59738	27.637	23.4516	17.3034	6.28816	6.70545	14.2846	4.32978	-1.03933	-0.00858913	-0.00138457	0.0425196	-0.00238142	0.430459	0.631617
Forest	2018-08-28	8	240	21	Summer	19.6	0.3885	14.46	0.908033	0.0813862	12.2028	7.5816	44.89	0.353288	23.9559	65.1616	9.69333	0.85964	0.652183	1.40559	0.937748	1.99619	28.5075	23.439	17.8385	5.98112	6.62486	12.8057	4.80334	6.31633	0.866626	0.672234	1.34295	0.959771	3.01648	29.1561	23.6768	16.7069	6.19753	6.87551	13.5079	3.87919	-3.377	0.00698629	0.0200507	-0.0626339	0.0220221	1.0203	0.648632
Forest	2018-09-11	9	254	22	Autumn	13.2	0.2162	1.276	0.289683	0.0471993	4.10975	2.70805	46.37	0.398973	7.41176	67.5554	6.27633	0.89035	0.645395	1.46472	0.939776	2.22522	28.0386	22.8249	18.8859	5.18008	6.32854	14.0917	4.65031	4.24	0.91575	0.686807	1.39328	0.953104	3.23823	28.4337	22.6781	19.9977	4.18937	6.11947	14.9178	3.66381	-2.03633	0.0254005	0.0414119	-0.0714393	0.0133281	1.01302	0.395153
Forest	2018-09-25	9	268	23	Autumn	13.8	0.0954	1.222	0.236879	0.0555408	3.07505	7.69224	45.7	0.397156	6.94853	83.3676	6.15667	0.912598	0.710671	1.28938	0.900853	1.92466	26.8906	23.8935	13.2082	8.74451	7.46837	12.5216	7.27332	5.13267	0.909602	0.677572	1.3122	0.929444	2.29016	27.4698	22.3472	18.7947	5.20567	6.06883	14.922	5.19165	-1.024	-0.00299684	-0.0330993	0.0228118	0.0285907	0.365494	0.579267
Forest	2018-10-09	10	282	24	Autumn	12.5	0.3132	3.82714	0.45258	0.0576866	5.88202	14.6346	40.94	0.34326	17.7794	104.726	10.6497	0.853162	0.679178	1.38053	0.939489	1.80226	30.7904	23.3476	15.421	6.63259	7.31801	12.0714	4.41901	11.153	0.849491	0.661507	1.41453	0.945829	1.69932	31.078	23.4853	15.7943	5.83116	7.19265	12.7013	3.91732	0.503333	-0.00367091	-0.0176706	0.0339939	0.00633976	-0.102949	0.287622
Forest	2018-10-23	10	296	25	Autumn	6.5	0.321	3.4695	0.501454	0.0422806	4.4271	6.50009	39.79	0.304746	17.2941	103.336	5.26533	0.851586	0.688909	1.41837	0.936604	2.77715	30.4001	23.1191	16.4547	5.58457	6.96136	12.4002	5.07999	5.441	0.862556	0.692469	1.44529	0.942182	2.69081	30.9918	23.153	15.316	5.90588	7.18396	13.0426	4.40677	0.175667	0.0109701	0.00355964	0.0269185	0.00557828	-0.086347	0.591735
Forest	2018-11-06	11	310	26	Autumn	7.4	0.4285	5.24029	0.618684	0.0606133	6.0156	7.7211	35.84	0.265114	15.9926	103.068	6.681	0.837125	0.652433	1.32272	0.93071	2.95612	32.2374	23.8697	11.8614	8.1782	8.12909	10.8493	4.87492	6.886	0.831847	0.668413	1.41482	0.946972	2.8473	32.9709	23.6239	13.5164	6.79681	7.75396	11.6142	3.72373	0.205	-0.00527779	0.0159801	0.0921061	0.0162626	-0.108823	0.733465
[truncated: 22 more columns]
